# Supplementary material for: Diminution of the gut resistome after a gut microbiota-targeted dietary intervention in obese children
Source: PubMed Central journal article supplement (PMC4820771; doi:10.1038/srep24030), 2016-04-05
Supplement: srep24030-s1.pdf [file srep24030-s1.pdf]

# **Diminution of the gut resistome after a gut microbiota-targeted dietary intervention in obese children**

**Guojun Wu, Chenhong Zhang, Jing Wang, Feng Zhang, Ruirui Wang, Jian Shen, Linghua**

**Wang, Xiaoyan Pang, Xiaojun Zhang, Liping Zhao, Menghui Zhang \***

## **Affiliation:**

*State Key Laboratory of Microbial Metabolism, Joint International Research Laboratory of*

*Metabolic & Developmental Sciences, and School of Life Sciences and Biotechnology,*

*Shanghai Jiao Tong University, Shanghai, 200240, P.R.China*

\* *Corresponding authors:* Menghui Zhang      e-mail: mhzhang@sjtu.edu.cn

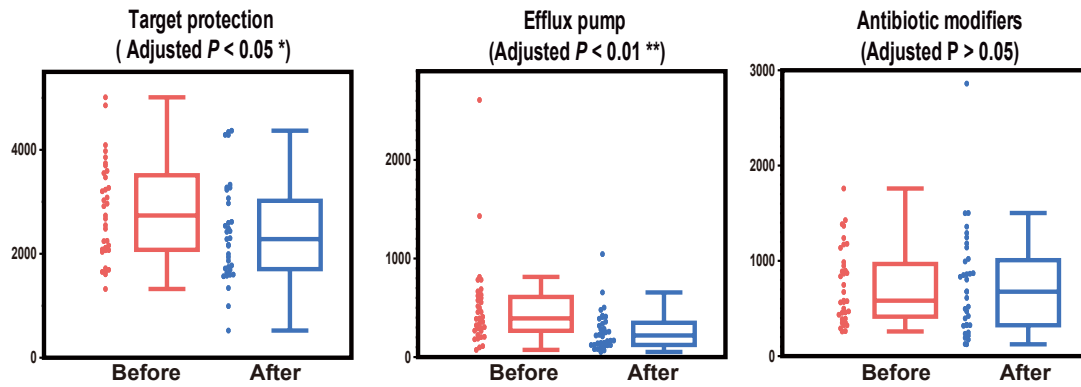

**Supplementary Figure S1 | The altered abundances of ARGs acting via**

**three different mechanisms.** The ARGs were assigned to the three major

resistance mechanisms according to ARDB. The abundances of ARGs conferring

resistance for the same mechanism were summed. The boxes denote the

interquartile range (IQR) between the first and third quartiles (25th and 75th

percentiles, respectively), and the line inside the boxes denotes the median. The

whiskers denote the lowest and highest values within 1.5 times of the IQR from

the first and third quartiles, respectively. The samples are displayed as the dot

on the left. Statistical analysis was performed with a two-tailed Wilcoxon

matched-pairs signed rank test ( $n = 35$ ). The P-values were adjusted (Benjamini

& Hochberg 1995).

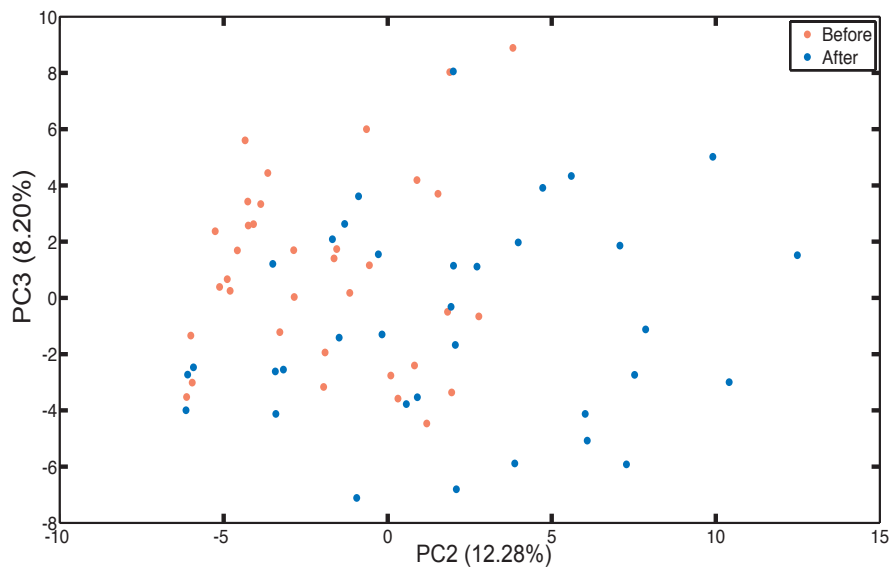

**Supplementary Figure S2 | The altered profiles of ARG carriers after dietary intervention.** PCA score plot based on the profile of 120 ARG carriers showing a trend for segregation between samples before and after dietary intervention (log-transformed, PERMONOVA  $P = 0.0584$ , permutation = 9999).

| Gene ID     | P-value*    | Change   | Gene type | Antibiotic                                                         | Antibiotic class                                                                  | Mechanism            |
|-------------|-------------|----------|-----------|--------------------------------------------------------------------|-----------------------------------------------------------------------------------|----------------------|
| G002_103489 | 0.010849027 | decrease | bill_ec   | cephalosporin                                                      | beta_lactam                                                                       | Antibiotic modifiers |
| G002_106249 | 0.022718203 | decrease | acrb      | aminoglycoside, glycyrrhizine, macrolide, beta_lactam              | aminoglycosides, glycyrrhizine, macrolide, beta_lactam                            | Efflux pump          |
| G002_110811 | 0.01954128  | decrease | ermq      | lincosamide, streptogramin_b, macrolide                            | lincosamides, streptogramin, macrolide                                            | Target protection    |
| G002_112204 | 0.02754178  | decrease | mtf       | erythromycin                                                       | macrolide                                                                         | Efflux pump          |
| G002_112205 | 0.011756398 | decrease | mtf       | erythromycin                                                       | macrolide                                                                         | Efflux pump          |
| G002_123177 | 0.01068977  | decrease | macb      | macrolide                                                          | macrolide                                                                         | Efflux pump          |
| G002_127083 | 0.01068977  | decrease | catall    | chloramphenicol                                                    | amphenicols                                                                       | Antibiotic modifiers |
| G002_158373 | 0.03738599  | decrease | tet40     | tetracycline                                                       | tetracyclines                                                                     | Efflux pump          |
| G002_174171 | 0.046471785 | decrease | teto      | tetracycline                                                       | tetracyclines                                                                     | Target protection    |
| G002_186861 | 0.006405585 | decrease | tetc      | tetracycline                                                       | tetracyclines                                                                     | Efflux pump          |
| G002_23042  | 0.011117519 | decrease | mtb       | fostomycin                                                         | other                                                                             | Efflux pump          |
| G002_23054  | 0.017763681 | decrease | mtg       | fostomycin                                                         | other                                                                             | Efflux pump          |
| G002_27563  | 0.010849027 | decrease | nfa       | NA                                                                 | NA                                                                                | NA                   |
| G002_29013  | 0.01068977  | decrease | emrd      | NA                                                                 | NA                                                                                | Efflux pump          |
| G002_41625  | 0.006405585 | decrease | mtk       | enoxacin, norfloxacin                                              | quinolone, quinolone                                                              | Efflux pump          |
| G002_45183  | 0.007289125 | decrease | rosb      | fosmidomycin                                                       | other                                                                             | Efflux pump          |
| G002_45198  | 0.01863889  | decrease | acra      | aminoglycoside, glycyrrhizine, macrolide, beta_lactam              | aminoglycosides, glycyrrhizine, macrolide, beta_lactam                            | Efflux pump          |
| G002_45199  | 0.008949203 | decrease | acrb      | aminoglycoside, glycyrrhizine, macrolide, beta_lactam              | aminoglycosides, glycyrrhizine, macrolide, beta_lactam                            | Efflux pump          |
| G002_50698  | 0.01068977  | decrease | ama       | polymyxin                                                          | polypeptides                                                                      | Target protection    |
| G002_57948  | 0.007289125 | decrease | mtm       | chloramphenicol, norfloxacin                                       | amphenicols, quinolone                                                            | Efflux pump          |
| G002_68989  | 0.006405585 | decrease | tolc      | aminoglycoside, glycyrrhizine, macrolide, beta_lactam              | aminoglycosides, glycyrrhizine, macrolide, beta_lactam                            | Efflux pump          |
| G002_73580  | 0.01333727  | decrease | baca      | bacitracin                                                         | polypeptides                                                                      | Efflux pump          |
| G002_82568  | 0.006405585 | decrease | mtl       | chloramphenicol                                                    | amphenicols                                                                       | Efflux pump          |
| G002_83077  | 0.01068977  | decrease | hcr       | NA                                                                 | NA                                                                                | Efflux pump          |
| G002_89355  | 0.022718203 | decrease | mtp       | purpocycin                                                         | aminocyclitol                                                                     | Efflux pump          |
| G002_89356  | 0.01782169  | decrease | mtt       | purpocycin                                                         | aminocyclitol                                                                     | Efflux pump          |
| G002_89357  | 0.010849027 | decrease | mtn       | purpocycin                                                         | aminocyclitol                                                                     | Efflux pump          |
| G002_97267  | 0.013767497 | decrease | ksga      | kasugamycin                                                        | aminoglycosides                                                                   | Target protection    |
| G003_234422 | 0.027332673 | decrease | aacfi     | isepamicin, netilmicin, tobramycin, amikacin, sisomicin, dibekacin | aminoglycosides, aminoglycosides, aminocyclitol, aminoglycosides, aminoglycosides | Antibiotic modifiers |
| G003_269264 | 0.023840108 | decrease | emrd      | NA                                                                 | NA                                                                                | Efflux pump          |
| G003_274003 | 0.039971477 | decrease | tetc      | tetracycline                                                       | tetracyclines                                                                     | Efflux pump          |
| G004_183056 | 0.047854853 | decrease | vamg      | vancomycin                                                         | glycopeptide                                                                      | Target protection    |
| G004_370449 | 0.01068977  | decrease | acra      | aminoglycoside, glycyrrhizine, macrolide, beta_lactam              | aminoglycosides, glycyrrhizine, macrolide, beta_lactam                            | Efflux pump          |
| G006_23263  | 0.032511559 | decrease | mtm       | chloramphenicol, norfloxacin                                       | amphenicols, quinolone                                                            | Efflux pump          |
| G006_135131 | 0.020962238 | decrease | bl2e_cep  | cephalosporin                                                      | beta_lactam                                                                       | Antibiotic modifiers |
| G006_152065 | 0.047854853 | decrease | teiq      | tetracycline                                                       | tetracyclines                                                                     | Target protection    |
| G011_81761  | 0.006405585 | decrease | ermg      | lincosamide, streptogramin_b, macrolide                            | lincosamides, streptogramin, macrolide                                            | Target protection    |
| G012_115363 | 0.010849027 | decrease | acrb      | aminoglycoside, glycyrrhizine, macrolide, beta_lactam              | aminoglycosides, glycyrrhizine, macrolide, beta_lactam                            | Efflux pump          |
| G013_66594  | 0.048980477 | decrease | mtb       | fostomycin                                                         | other                                                                             | Efflux pump          |
| G013_88182  | 0.019889406 | decrease | acra      | aminoglycoside, glycyrrhizine, macrolide, beta_lactam              | aminoglycosides, glycyrrhizine, macrolide, beta_lactam                            | Efflux pump          |
| G015_139317 | 0.007107035 | decrease | tetc      | tetracycline                                                       | tetracyclines                                                                     | Efflux pump          |
| G015_245514 | 0.011117519 | decrease | bill_ec   | cephalosporin                                                      | beta_lactam                                                                       | Antibiotic modifiers |
| G018_219448 | 0.047854853 | decrease | tet32     | tetracycline                                                       | tetracyclines                                                                     | Target protection    |
| G020_105167 | 0.022817204 | decrease | rosa      | fosmidomycin                                                       | other                                                                             | Efflux pump          |
| G020_121947 | 0.04029534  | decrease | tetpb     | tetracycline                                                       | tetracyclines                                                                     | Target protection    |
| G020_71487  | 0.038612143 | decrease | baca      | bacitracin                                                         | polypeptides                                                                      | Efflux pump          |
| G020_92301  | 0.047854853 | decrease | ksga      | kasugamycin                                                        | aminoglycosides                                                                   | Target protection    |
| G021_110170 | 0.03891539  | decrease | tetpb     | tetracycline                                                       | tetracyclines                                                                     | Target protection    |
| G023_145347 | 0.006405585 | decrease | acra      | aminoglycoside, glycyrrhizine, macrolide, beta_lactam              | aminoglycosides, glycyrrhizine, macrolide, beta_lactam                            | Efflux pump          |
| G023_145348 | 0.00710725  | decrease | acrb      | aminoglycoside, glycyrrhizine, macrolide, beta_lactam              | aminoglycosides, glycyrrhizine, macrolide, beta_lactam                            | Efflux pump          |
| G024_225038 | 0.006405585 | decrease | tetc      | tetracycline                                                       | tetracyclines                                                                     | Efflux pump          |
| G026_103338 | 0.022840108 | decrease | mtg       | fostomycin                                                         | other                                                                             | Efflux pump          |
| G026_138810 | 0.018240177 | decrease | tolc      | aminoglycoside, glycyrrhizine, macrolide, beta_lactam              | aminoglycosides, glycyrrhizine, macrolide, beta_lactam                            | Efflux pump          |
| G026_144604 | 0.045070807 | decrease | ber       | NA                                                                 | NA                                                                                | Efflux pump          |
| G028_61950  | 0.010849027 | decrease | tetc      | tetracycline                                                       | tetracyclines                                                                     | Efflux pump          |
| G029_109842 | 0.047854853 | decrease | teto      | tetracycline                                                       | tetracyclines                                                                     | Target protection    |
| G031_102048 | 0.010849027 | decrease | baca      | bacitracin                                                         | polypeptides                                                                      | Efflux pump          |
| G031_147921 | 0.007289125 | decrease | tetc      | tetracycline                                                       | tetracyclines                                                                     | Efflux pump          |
| G031_154298 | 0.03784003  | decrease | tolc      | aminoglycoside, glycyrrhizine, macrolide, beta_lactam              | aminoglycosides, glycyrrhizine, macrolide, beta_lactam                            | Efflux pump          |
| G031_231624 | 0.010683375 | decrease | nfa       | NA                                                                 | NA                                                                                | NA                   |
| G031_256237 | 0.03784003  | decrease | bl2a_otp  | penicillin                                                         | NA                                                                                | Antibiotic modifiers |
| G031_269207 | 0.03891539  | decrease | acrb      | lincosamide, streptogramin_b, macrolide                            | lincosamides, streptogramin, macrolide                                            | Target protection    |
| G032_10102  | 0.020969055 | decrease | acrb      | aminoglycoside, glycyrrhizine, macrolide, beta_lactam              | aminoglycosides, glycyrrhizine, macrolide, beta_lactam                            | Efflux pump          |
| G032_113960 | 0.049345271 | decrease | mtb       | fostomycin                                                         | other                                                                             | Efflux pump          |
| G032_140719 | 0.018997409 | decrease | macb      | macrolide                                                          | macrolide                                                                         | Efflux pump          |
| G032_250806 | 0.022718203 | decrease | vamg      | vancomycin                                                         | glycopeptide                                                                      | Target protection    |
| G032_26136  | 0.006405585 | decrease | acra      | aminoglycoside, glycyrrhizine, macrolide, beta_lactam              | aminoglycosides, glycyrrhizine, macrolide, beta_lactam                            | Efflux pump          |
| G032_84470  | 0.02754178  | decrease | mtk       | enoxacin, norfloxacin                                              | quinolone, quinolone                                                              | Efflux pump          |
| G032_8579   | 0.024011769 | decrease | ama       | polymyxin                                                          | polypeptides                                                                      | Target protection    |
| G036_144381 | 0.02852171  | decrease | su12      | sulfonamide                                                        | sulfonamide                                                                       | Target protection    |
| G036_225459 | 0.006405585 | decrease | tetc      | tetracycline                                                       | tetracyclines                                                                     | Efflux pump          |
| G039_140471 | 0.01215458  | decrease | mtm       | chloramphenicol, norfloxacin                                       | amphenicols, quinolone                                                            | Efflux pump          |
| G040_197303 | 0.011117519 | decrease | ama       | polymyxin                                                          | polypeptides                                                                      | Target protection    |
| G040_248676 | 0.008490279 | decrease | acrb      | aminoglycoside, glycyrrhizine, macrolide, beta_lactam              | aminoglycosides, glycyrrhizine, macrolide, beta_lactam                            | Efflux pump          |
| G041_230207 | 0.010683375 | decrease | acrb      | aminoglycoside, glycyrrhizine, macrolide, beta_lactam              | aminoglycosides, glycyrrhizine, macrolide, beta_lactam                            | Efflux pump          |
| G043_122542 | 0.006405585 | decrease | mtm       | chloramphenicol, norfloxacin                                       | amphenicols, quinolone                                                            | Efflux pump          |
| G043_91986  | 0.022184965 | decrease | acrb      | aminoglycoside, glycyrrhizine, macrolide, beta_lactam              | aminoglycosides, glycyrrhizine, macrolide, beta_lactam                            | Efflux pump          |
| G050_155565 | 0.019754128 | decrease | ama       | polymyxin                                                          | polypeptides                                                                      | Target protection    |
| G051_174000 | 0.00962987  | decrease | tetc      | tetracycline                                                       | tetracyclines                                                                     | Efflux pump          |
| G052_146010 | 0.010849027 | decrease | acra      | aminoglycoside, glycyrrhizine, macrolide, beta_lactam              | aminoglycosides, glycyrrhizine, macrolide, beta_lactam                            | Efflux pump          |
| G052_217520 | 0.006405585 | decrease | acrb      | aminoglycoside, glycyrrhizine, macrolide, beta_lactam              | aminoglycosides, glycyrrhizine, macrolide, beta_lactam                            | Efflux pump          |
| G052_222708 | 0.006405585 | decrease | mtk       | enoxacin, norfloxacin                                              | quinolone, quinolone                                                              | Efflux pump          |
| G056_156702 | 0.01863889  | decrease | acrb      | aminoglycoside, glycyrrhizine, macrolide, beta_lactam              | aminoglycosides, glycyrrhizine, macrolide, beta_lactam                            | Efflux pump          |
| G056_191144 | 0.022840108 | decrease | acra      | aminoglycoside, glycyrrhizine, macrolide, beta_lactam              | aminoglycosides, glycyrrhizine, macrolide, beta_lactam                            | Efflux pump          |
| G056_215195 | 0.022840108 | decrease | acrb      | aminoglycoside, glycyrrhizine, macrolide, beta_lactam              | aminoglycosides, glycyrrhizine, macrolide, beta_lactam                            | Efflux pump          |
| G059_221482 | 0.006405585 | decrease | mtm       | chloramphenicol, norfloxacin                                       | amphenicols, quinolone                                                            | Efflux pump          |
| G004_205799 | 0.002729865 | increase | p6p6      | penicillin                                                         | beta_lactam                                                                       | Target protection    |
| G004_112145 | 0.00213488  | increase | p6p6      | penicillin                                                         | beta_lactam                                                                       | Target protection    |
| G006_240415 | 0.003591982 | increase | p6p6      | penicillin                                                         | beta_lactam                                                                       | Target protection    |
| G017_122282 | 0.00214111  | increase | ermx      | lincosamide, streptogramin_b, macrolide                            | lincosamides, streptogramin, macrolide                                            | Target protection    |
| G024_231729 | 0.009789412 | increase | p6p6      | penicillin                                                         | beta_lactam                                                                       | Target protection    |
| G032_160233 | 0.00398803  | increase | ter1      | tetracycline                                                       | tetracyclines                                                                     | Efflux pump          |
| G035_157074 | 0.000151587 | increase | ermx      | lincosamide, streptogramin_b, macrolide                            | lincosamides, streptogramin, macrolide                                            | Target protection    |
| G039_124849 | 0.000488281 | increase | baca      | bacitracin                                                         | polypeptides                                                                      | Efflux pump          |
| G040_172907 | 0.005306385 | increase | p6p2b     | penicillin                                                         | beta_lactam                                                                       | Target protection    |
| G051_86167  | 0.000776411 | increase | baca      | bacitracin                                                         | polypeptides                                                                      | Efflux pump          |

\* P value was calculated by two-tailed Wilcoxon matched-pairs signed rank test (n=35) and adjusted by Benjamini & Hochberg 1995

## Supplementary Table S1 |The information of the 96 ARGs with significant changes.
